# Supplementary material
Source: PubMed Central journal article supplement (PMC4011342)
Supplement: cr201427x1.pdf [file cr201427x1.pdf]

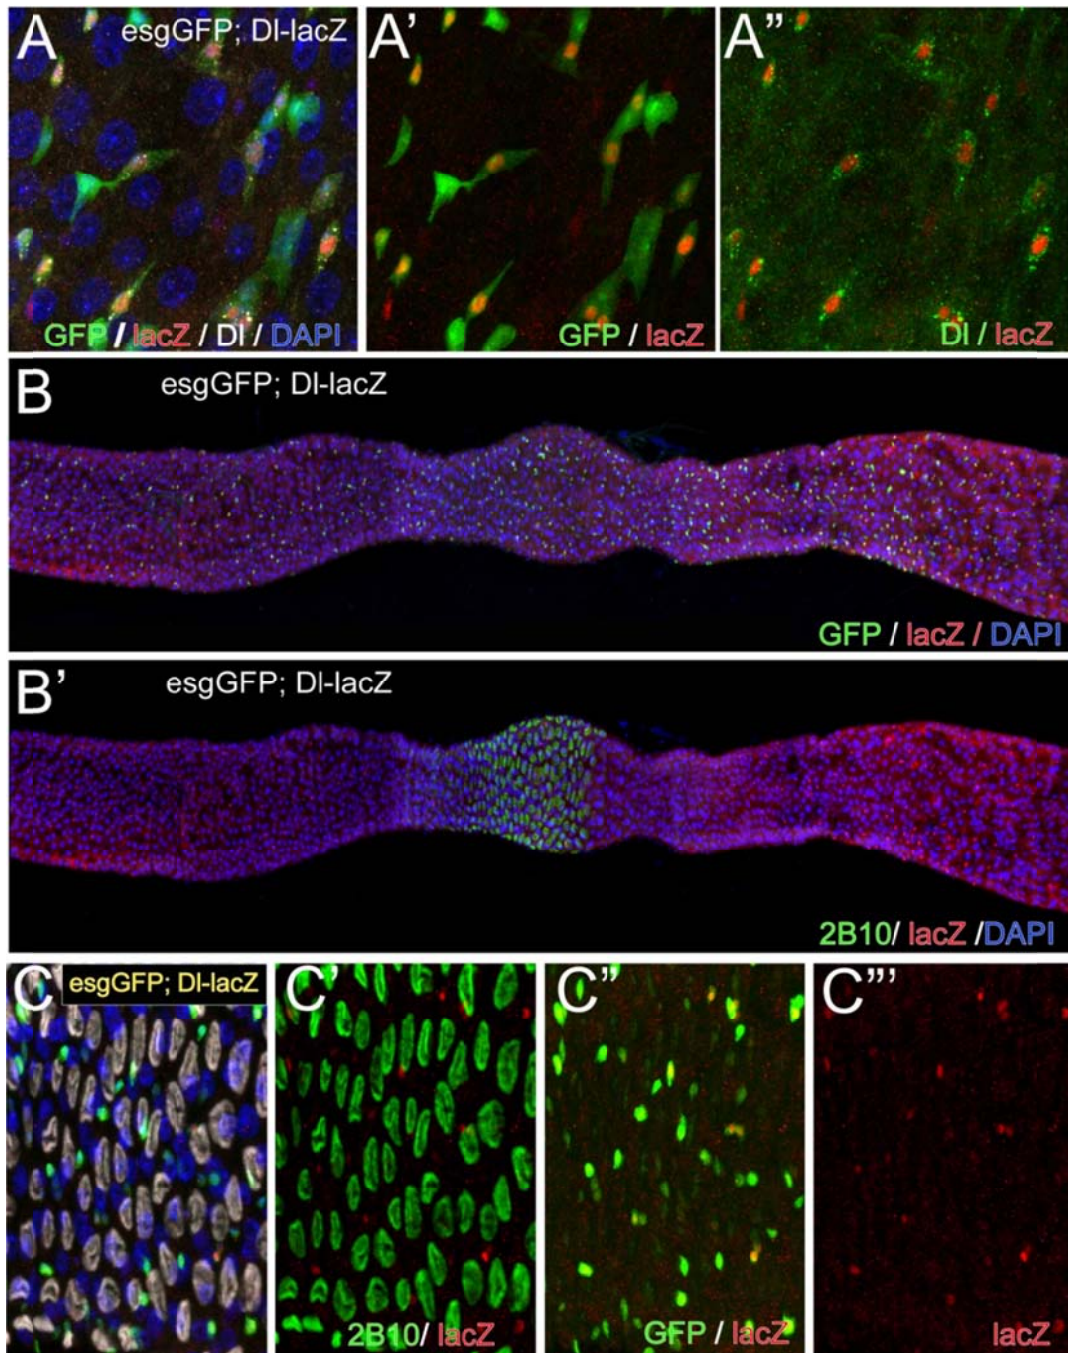

**Supplementary information, Figure S1** Dl-lacZ is expressed in a subpopulation of  $esg>GFP^+$  cells in the CCR. (A-A'') Dl-lacZ<sup>+</sup> (red) cells are among  $esg>GFP^+$  (green) cells, and can be labeled by a Dl antibody (white in A and green in A''). (B) Dl-lacZ<sup>+</sup> cells are among  $esg>GFP^+$  cells throughout the midgut. (B') The same gut in B stained with 2B10 antibody showing that Dl-lacZ is also expressed in the CCR. (C-C''')

An enlarged view of the expression of D1-lacZ (in red) in the CCR. Note D1-lacZ<sup>+</sup> cells are negative for 2B10 staining (white in C, green in C'), but positive for *esg*>GFP (green in C and C').
