# Supplementary material
Source: PubMed Central journal article supplement (PMC4011342)
Supplement: cr201427x2.pdf [file cr201427x2.pdf]

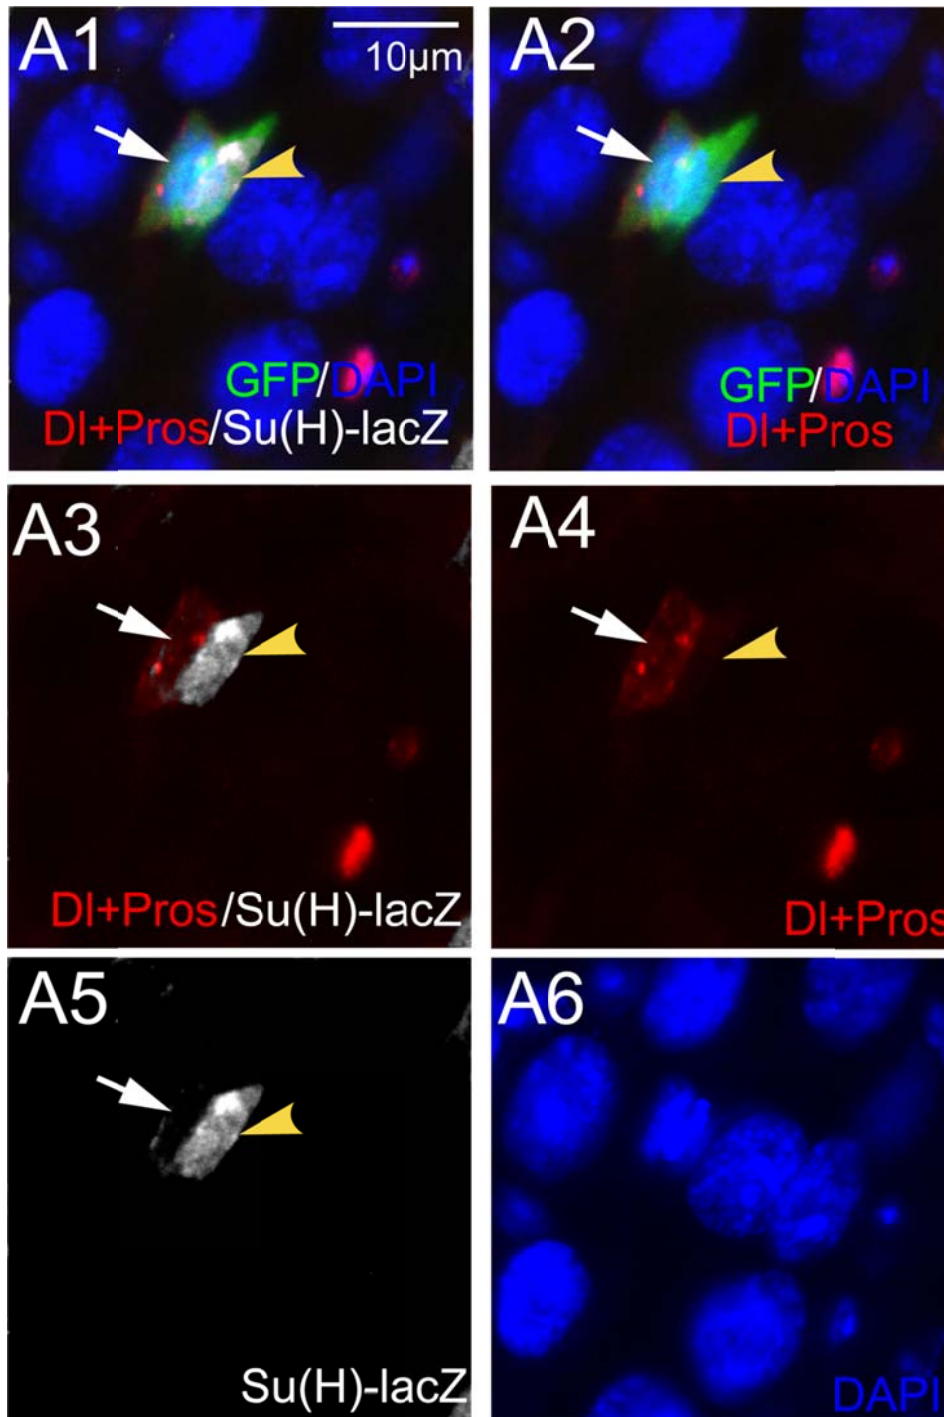

**Supplementary information, Figure S2**  $DI^+$  cells and  $Su(H)\text{-lacZ}^+$  cells in the CCR are lineage-related. A GFP clone (in green) generated by the MARCM system contains one  $DI^+$  (in red, arrow) cell and one  $Su(H)\text{-lacZ}^+$  (in white, arrowhead) cell. DAPI staining is in blue. The common origin of these two cells indicates that they are lineage-related.
