# Supplementary material
Source: PubMed Central journal article supplement (PMC4011342)
Supplement: cr201427x3.pdf [file cr201427x3.pdf]

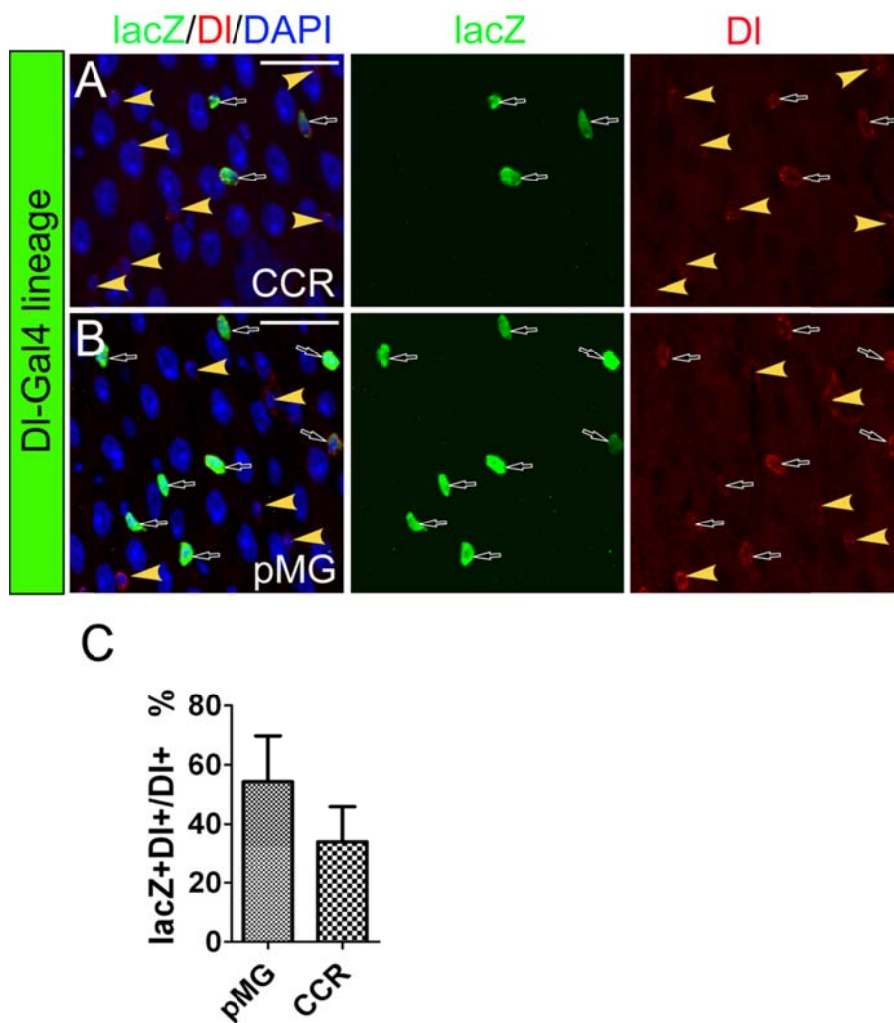

**Supplemental information, Figure S3** Labeling efficiency of DI-Gal4<sup>ts</sup>- directed lineage tracing. (A-B) Flies carrying DI-Gal4<sup>ts</sup> and flip-out cassette systems for lineage tracing experiments were raised at 18°C and shifted to 29°C for 7 days before analysis. (A) In the CCR, only a small percentage of DI<sup>+</sup> cells (in red, membrane) are induced to express lacZ (in green, indicated by arrows), most of them (indicated by arrowheads) were not labeled by lacZ staining. (B) Similarly, in the posterior midgut, not all DI<sup>+</sup> cells (in red, membrane) are induced to express lacZ (in green). (C) Quantification of the percentage of DI<sup>+</sup> cells that are induced to express lacZ in the CCR or pMG.
